# Supplementary material for: Fucoidan Isolated from Saccharina japonica Inhibits LPS-Induced Inflammation in Macrophages via Blocking NF-κB, MAPK and JAK-STAT Pathways
Source: MDPI journal article supplement (doi:10.3390/md18060328), 2020-06-24
Supplement: s1 [file s1]

## Supporting Information

### **Fucoidan isolated from *Saccharina japonica* inhibit LPS-induced inflammation in macrophages**

Jing Ye<sup>1,2\*</sup>, Donghui Chen<sup>1</sup>, Zhicheng Ye<sup>1</sup>, Yayan Huang<sup>1</sup>, Na Zhang<sup>1,2</sup>, Edmund M. K. Lui<sup>3</sup>,  
Changhu Xue<sup>4</sup>, and Meitian Xiao<sup>1,2</sup>

<sup>1</sup> College of Chemical Engineering, Huaqiao University, Xiamen 361021, China

<sup>2</sup> Xiamen Engineering and Technological Research Center for Comprehensive Utilization of Marine  
Biological Resources, Xiamen 361021, China

<sup>3</sup> Physiology and Pharmacology, Western University, London Ontario N6A 5B9, Canada

<sup>4</sup> College of Food Science and Engineering, Ocean University of China, Qingdao 266003, China

**\* Corresponding author:**

**Jing Ye**

College of Chemical Engineering, Huaqiao University, Xiamen 361021, Fujian, China

E-mail: [yejenny@hqu.edu.cn](mailto:yejenny@hqu.edu.cn), Tel./fax: +86-592-6162300

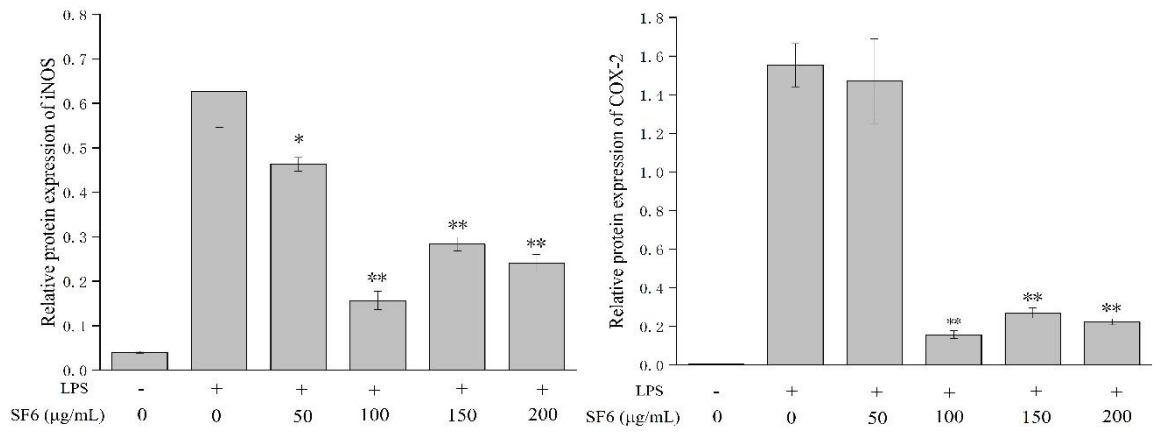

Figure S1 Effects of SF6 on the relative protein expression of iNOS and COX-2 in LPS-stimulated RAW264.7 cells.

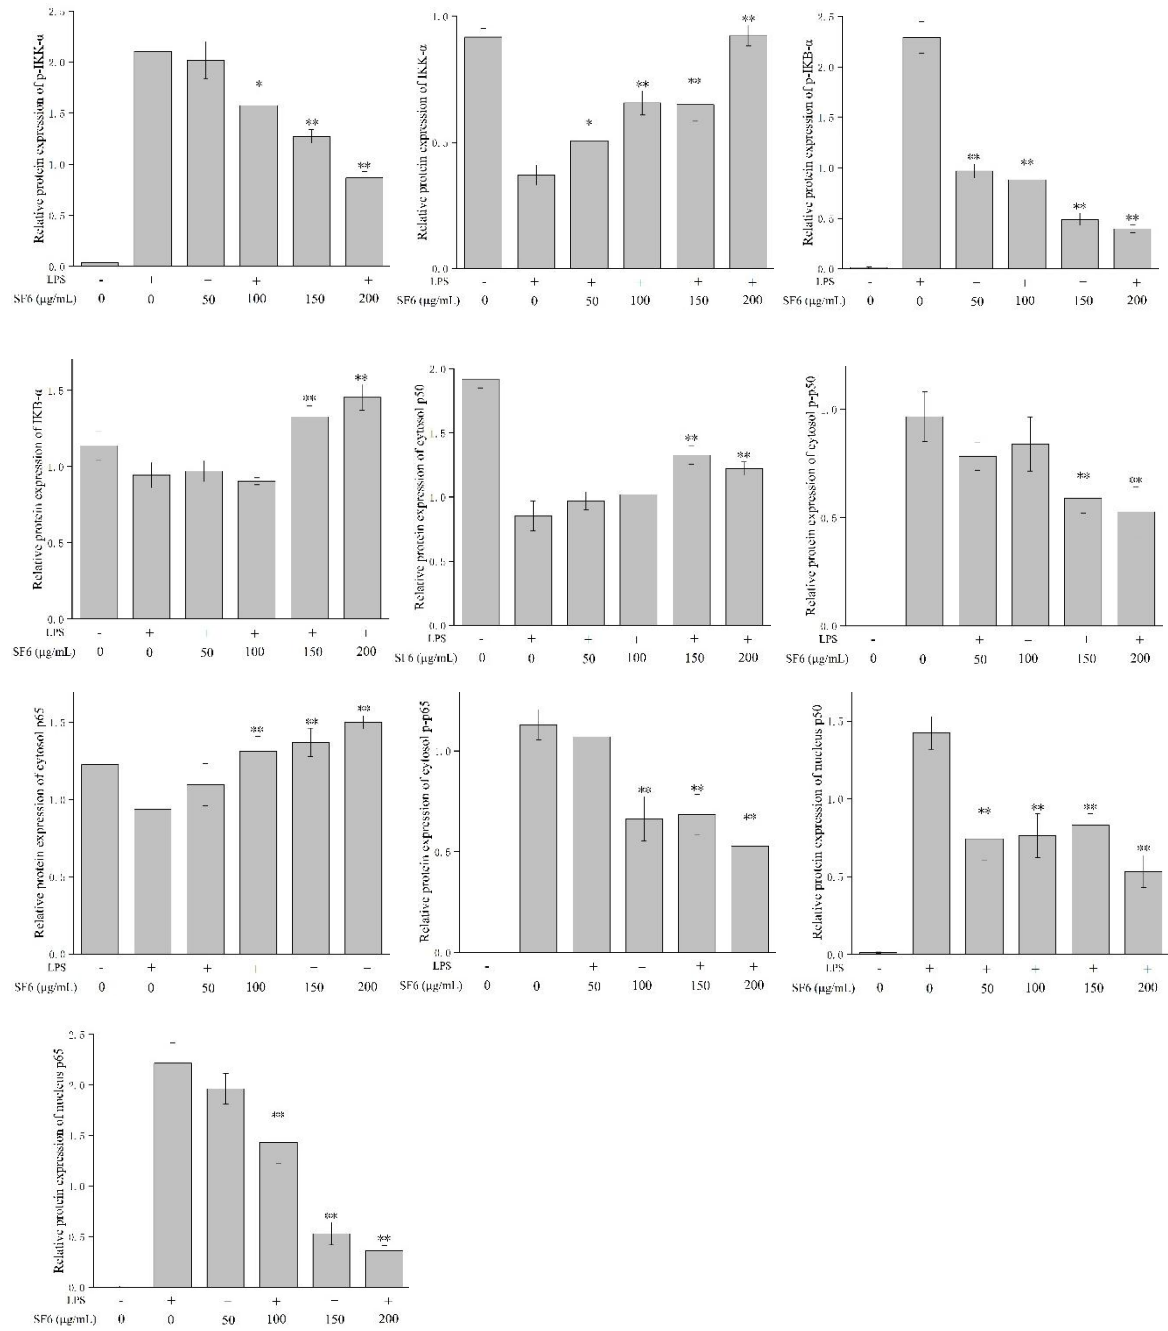

Figure S2 Effects of SF6 on the relative protein expression of the NF-κB signaling pathway in LPS-stimulated RAW264.7 macrophages.

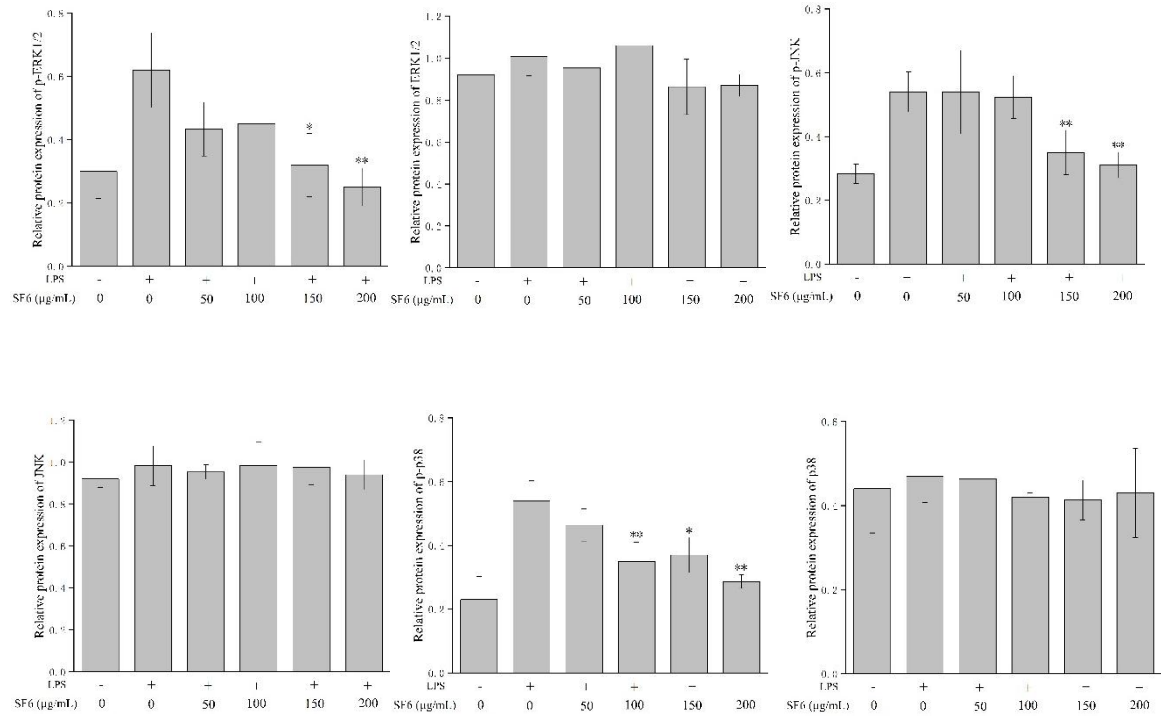

Figure S3 Effects of SF6 on the relative protein expression of the NF-κB signaling pathway in LPS-stimulated RAW264.7 macrophages.

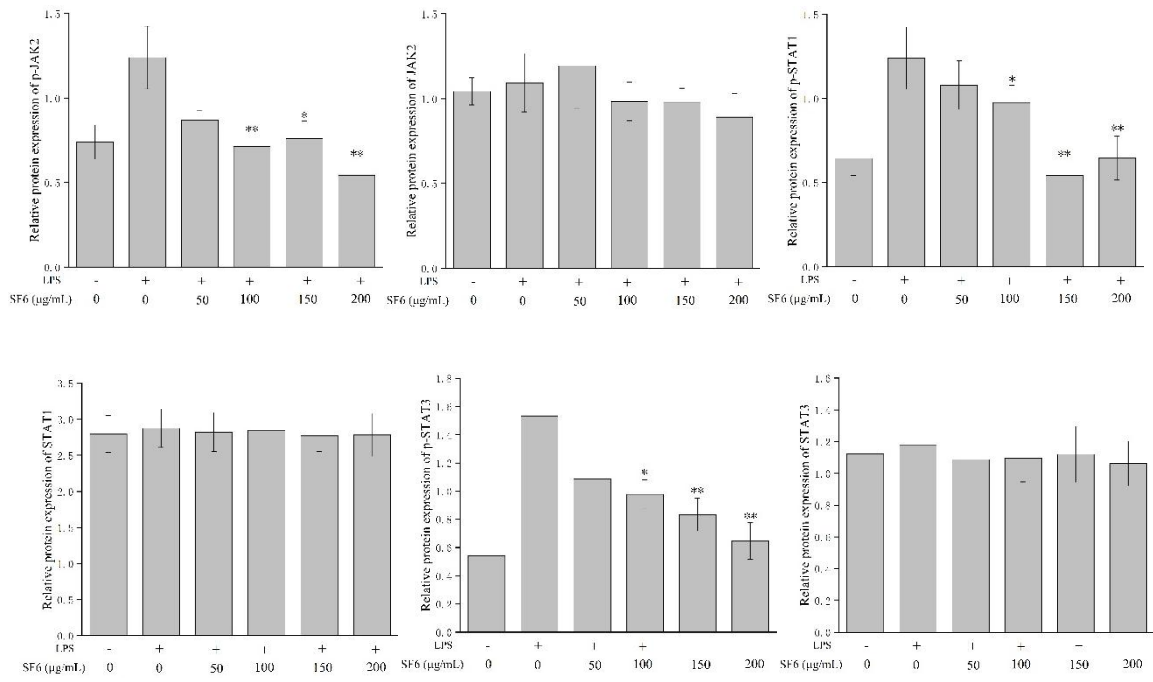

Figure S4 SF6 Effects of SF6 on the relative protein expression of the JAK2-STAT1/3 signaling pathway in LPS-stimulated RAW264.7 macrophages.
